# Supplementary material for: Lung transcriptome of nonhuman primates exposed to total- and partial-body irradiation
Source: PubMed Central journal article supplement — Mol Ther Nucleic Acids. 2022 Aug 4;29:584–98. doi: 10.1016/j.omtn.2022.08.006 (PMC9418744; doi:10.1016/j.omtn.2022.08.006), 2022-08-04
Supplement: mmc1.pdf [file mmc1.pdf]

**OMTN, Volume 29**

**Supplemental information**

**Lung transcriptome of nonhuman primates  
exposed to total- and partial-body irradiation**

**Neetha Nanth Vellichirammal, Sahil Sethi, Sanjit Pandey, Jatinder Singh, Stephen Y. Wise, Alana D. Carpenter, Oluseyi O. Fatanmi, Chittibabu Guda, and Vijay K. Singh**

**Supplementary Tables** (available separately as Excel file)

**Table S1:** Comparison of healthy controls with total-body irradiated animals treated with vehicle

**Table S2:** IPA enriched pathways: comparison of healthy controls with total-body irradiated animals treated with vehicle

**Table S3:** Comparison of healthy controls with total-body irradiated animals treated with GT3

**Table S4:** IPA enriched pathways: comparison of healthy controls with total-body irradiated animals treated with vehicle

**Table S5:** Comparison of total-body irradiated males and females treated with GT3

**Table S6:** IPA enriched pathways: comparison of males and females pretreated with GT3 and exposed to total-body radiation

**Table S7:** Comparison of total-body irradiated males and females treated with vehicle

**Table S8:** Comparison of total-body irradiated animals treated with GT3 and vehicle

**Table S9:** Comparison of total-body irradiated animals treated with GT3 and vehicle - day 4

**Table S10:** Comparison of total-body irradiated animals treated with GT3 and vehicle - day 7

**Table S11:** Comparison of healthy controls with partial-body irradiated animals treated with vehicle

**Table S12:** IPA enriched pathways: comparison of healthy and animals pretreated with vehicle and exposed to partial-body radiation

**Supplemental Table 13:** Comparison of healthy controls with partial-body irradiated animals treated with GT3

**Table S14:** IPA enriched pathways: Comparison of healthy controls with partial-body irradiated animals treated with GT3

**Table S15:** Comparison of partial-body irradiated males and females treated with vehicle

**Table S16:** IPA enriched pathways: Comparison of male and female animals treated with vehicle and exposed to partial-body radiation

**Table S17:** Comparison of partial-body irradiated males and females treated with GT3

**Table S18:** IPA enriched pathways: Comparison of male and female animals treated with GT3 and exposed to partial-body radiation

**Table S19:** Comparison of partial-body irradiated animals treated with GT3 and vehicle - day 4

**Table S20:** Comparison of partial-body irradiated animals treated with GT3 and vehicle - day 4

**Table S21:** IPA enriched pathways: Comparison of animals treated with vehicle or GT3 and exposed to partial-body radiation - day 4

**Table S22:** Comparison of animals exposed to total- or partial-body radiation pretreated with GT3

**Table S23:** IPA analysis of animals exposed to total- or partial-body radiation pretreated with GT3: TBI-GT3 vs. PBI-GT3 comparison

**Table S24:** Comparison of animals treated with vehicle and exposed to total or partial- body radiation

**Table S25:** IPA enriched pathways: Comparison of animals treated with vehicle and exposed to total- or partial-body radiation

**Table S26:** Comparison of male NHPs treated with GT3 and exposed to total- or partial-body radiation

**Table S27:** IPA enriched pathways: Comparison of male NHPs treated with GT3 and exposed to total- or partial-body radiation

**Table S28:** Comparison of female NHPs treated with GT3 and exposed to total- or partial-body radiation

**Table S29:** Comparison of female NHPs treated with GT3 and exposed to total- or partial-body radiation  
IPA results

**A**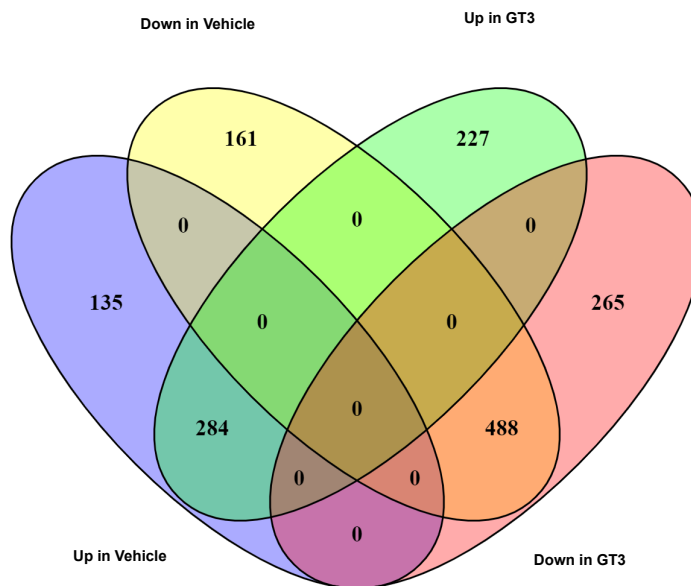**B**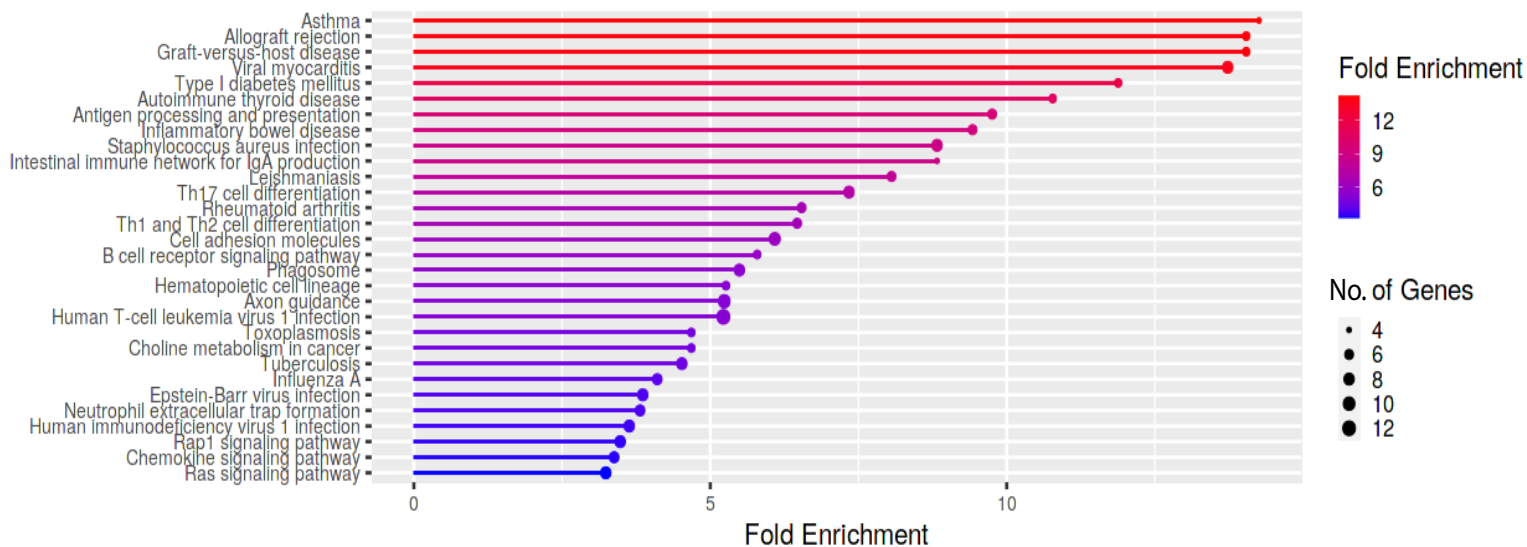**C**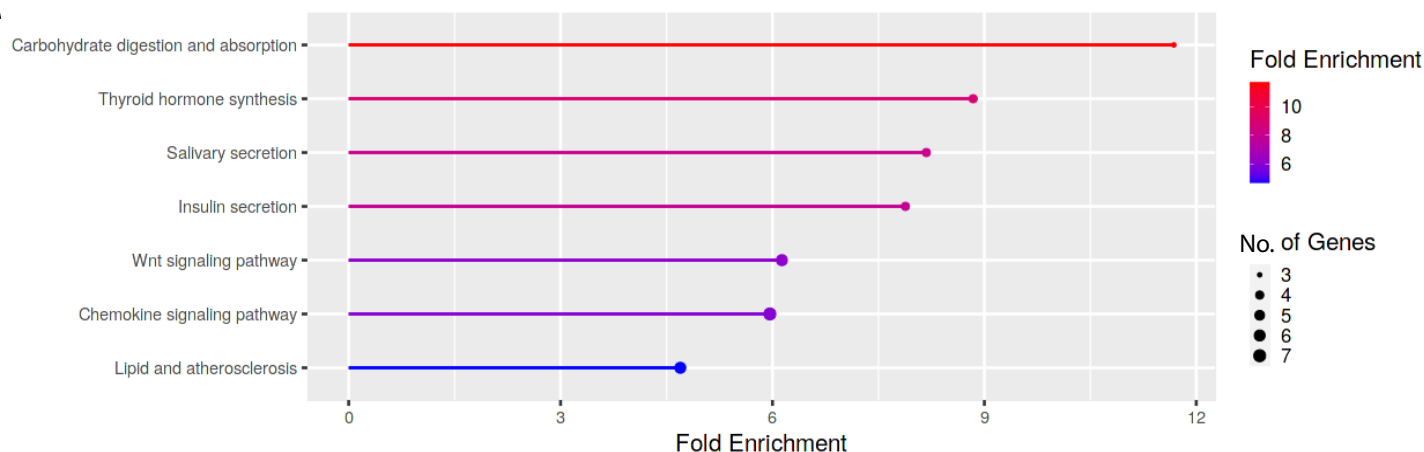

**Figure S1: A.** Common enriched IPA pathways identified in TBI-GT3 vs. Controls and TBI-Veh vs. Controls. Pathways differentially upregulated and downregulated are represented in this Venn diagram. **B.** KEGG enrichment analysis of the comparison TBI-GT3 vs. Controls and TBI-Veh vs. Controls. Only genes downregulated exclusively in TBI-GT3 compared to controls (n=265 in Supplementary Figure 1A) is included in this analysis. Top 20 enriched KEGG pathways are represented in this figure. The Y-axis lists pathways in order of the enrichment of FDR. The X-axis shows the FDR values for the enrichment of KEGG pathways. The color chart shows fold enrichment for each enriched pathway and the size of dots corresponds to the number of genes assigned to each pathway. **C.** KEGG enrichment analysis of the comparison TBI-GT3 vs. Controls and TBI-Veh vs. Controls. Only unique genes downregulated in irradiated (TBI-Veh, n=161 in Supplementary Figure 1A) is included in this analysis.

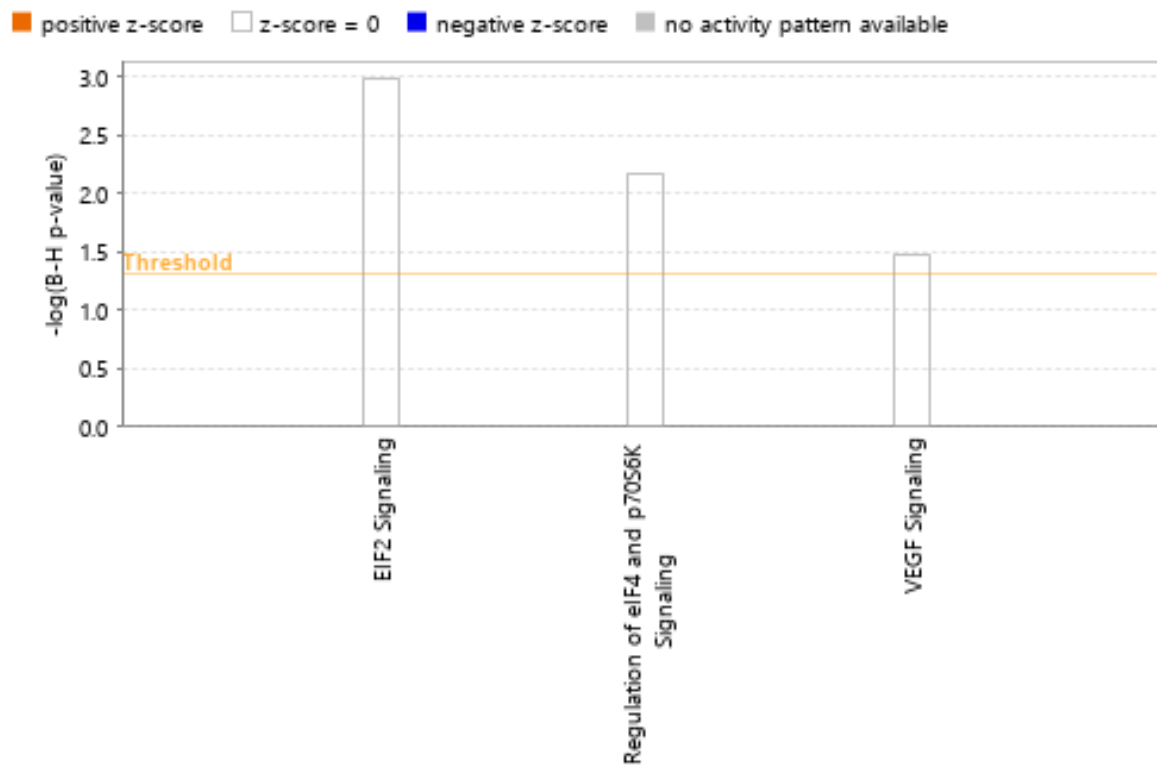

© 2000-2022 QIAGEN. All rights reserved.

**Figure S2:** IPA enrichment analysis of the genes differentially expressed in the TBI-Veh and TBI-GT3 comparison. The Y-axis gives the negative logarithm function of Benjamini-Hochberg (B-H) false discovery rate p-value. White bars represent a z-score of 0, which is represented in this figure.

**A**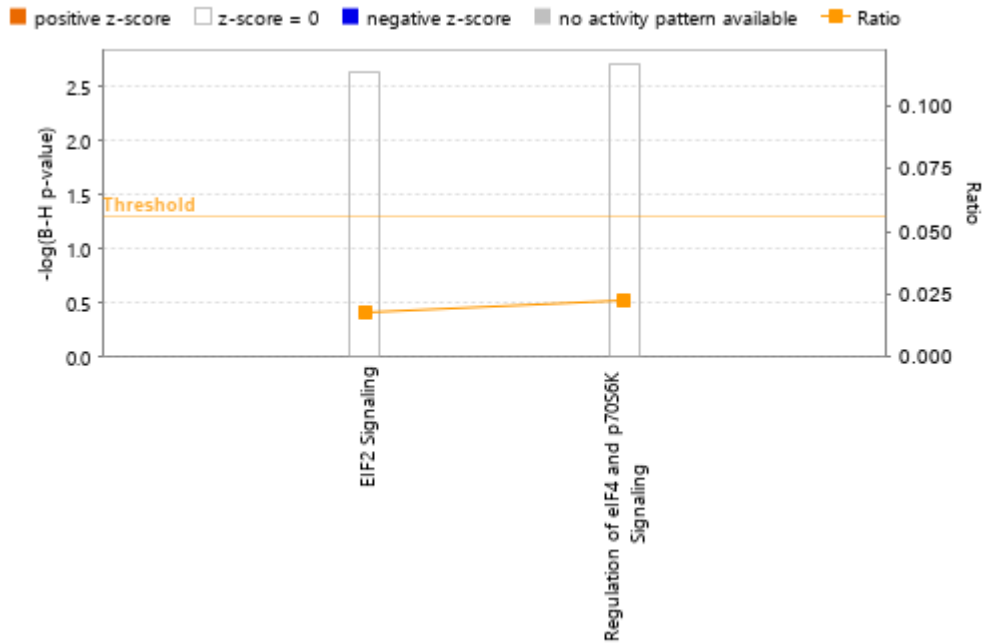**B**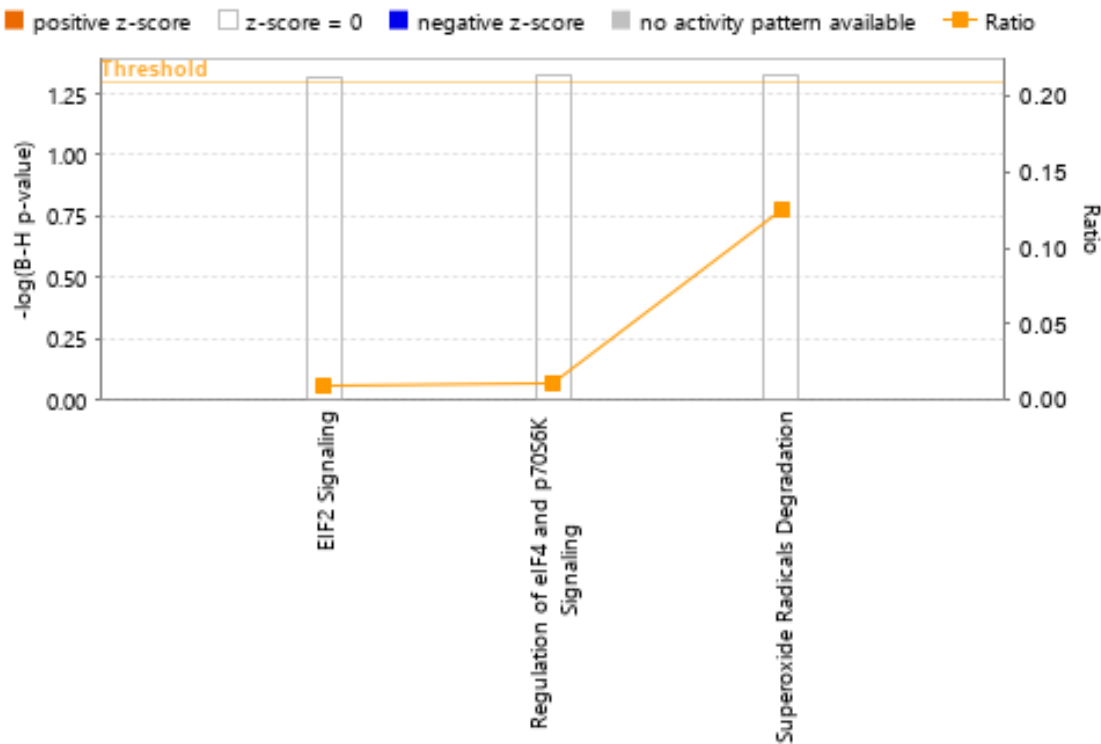

© 2000-2022 QIAGEN. All rights reserved.

**Figure S3: A.** IPA analysis of enriched pathways among PBI-M-Veh vs. PBI-F-Veh comparison. **B.** IPA analysis of enriched pathways among PBI-M-GT3 vs. PBI-F-GT3 comparison. The Y-axis gives the negative logarithm function of Benjamini-Hochberg (B-H) false discovery rate p-value. White bars represent a z-score of 0, which is represented in this figure.

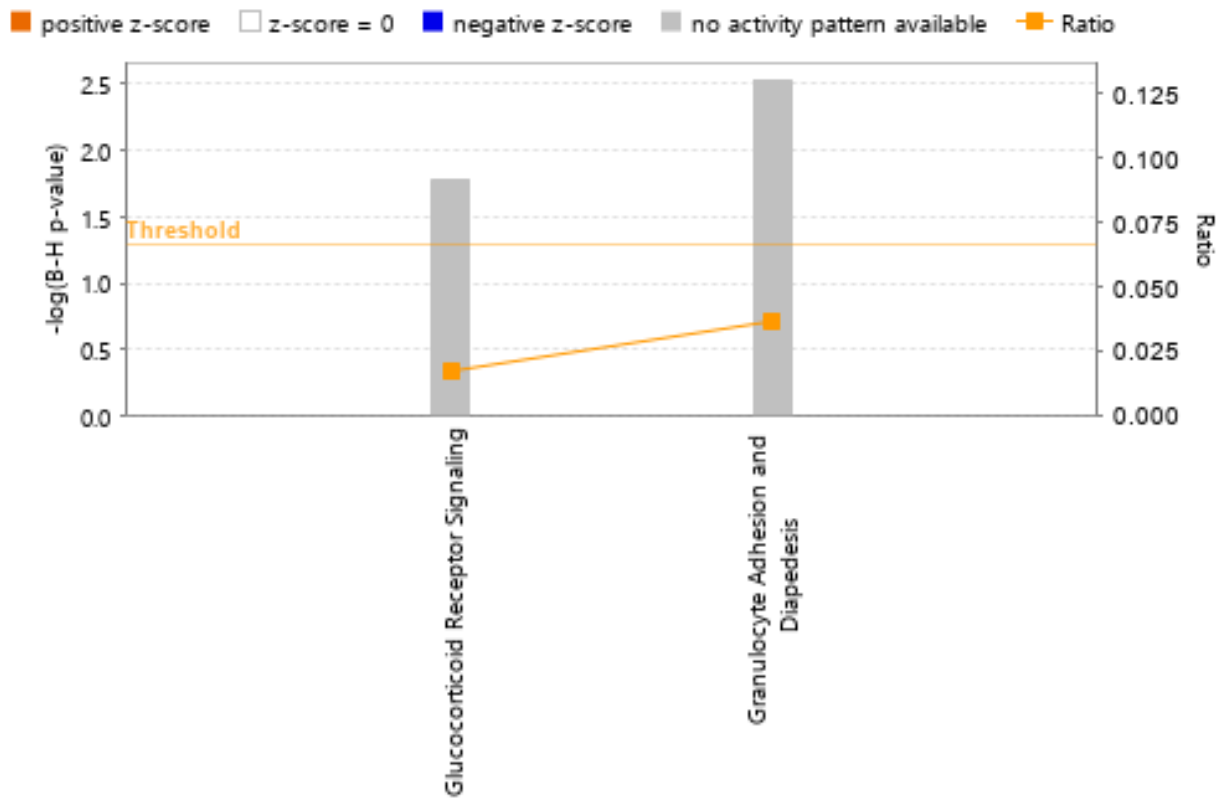

© 2000-2022 QIAGEN. All rights reserved.

**Figure S4:** IPA analysis of enriched pathways among PBI-Veh at day 4 vs. PBI-GT3 at day 4 comparison. The Y-axis gives the negative logarithm function of Benjamini-Hochberg (B-H) false discovery rate p-value. White bars represent a z-score of 0, which is represented in this figure.

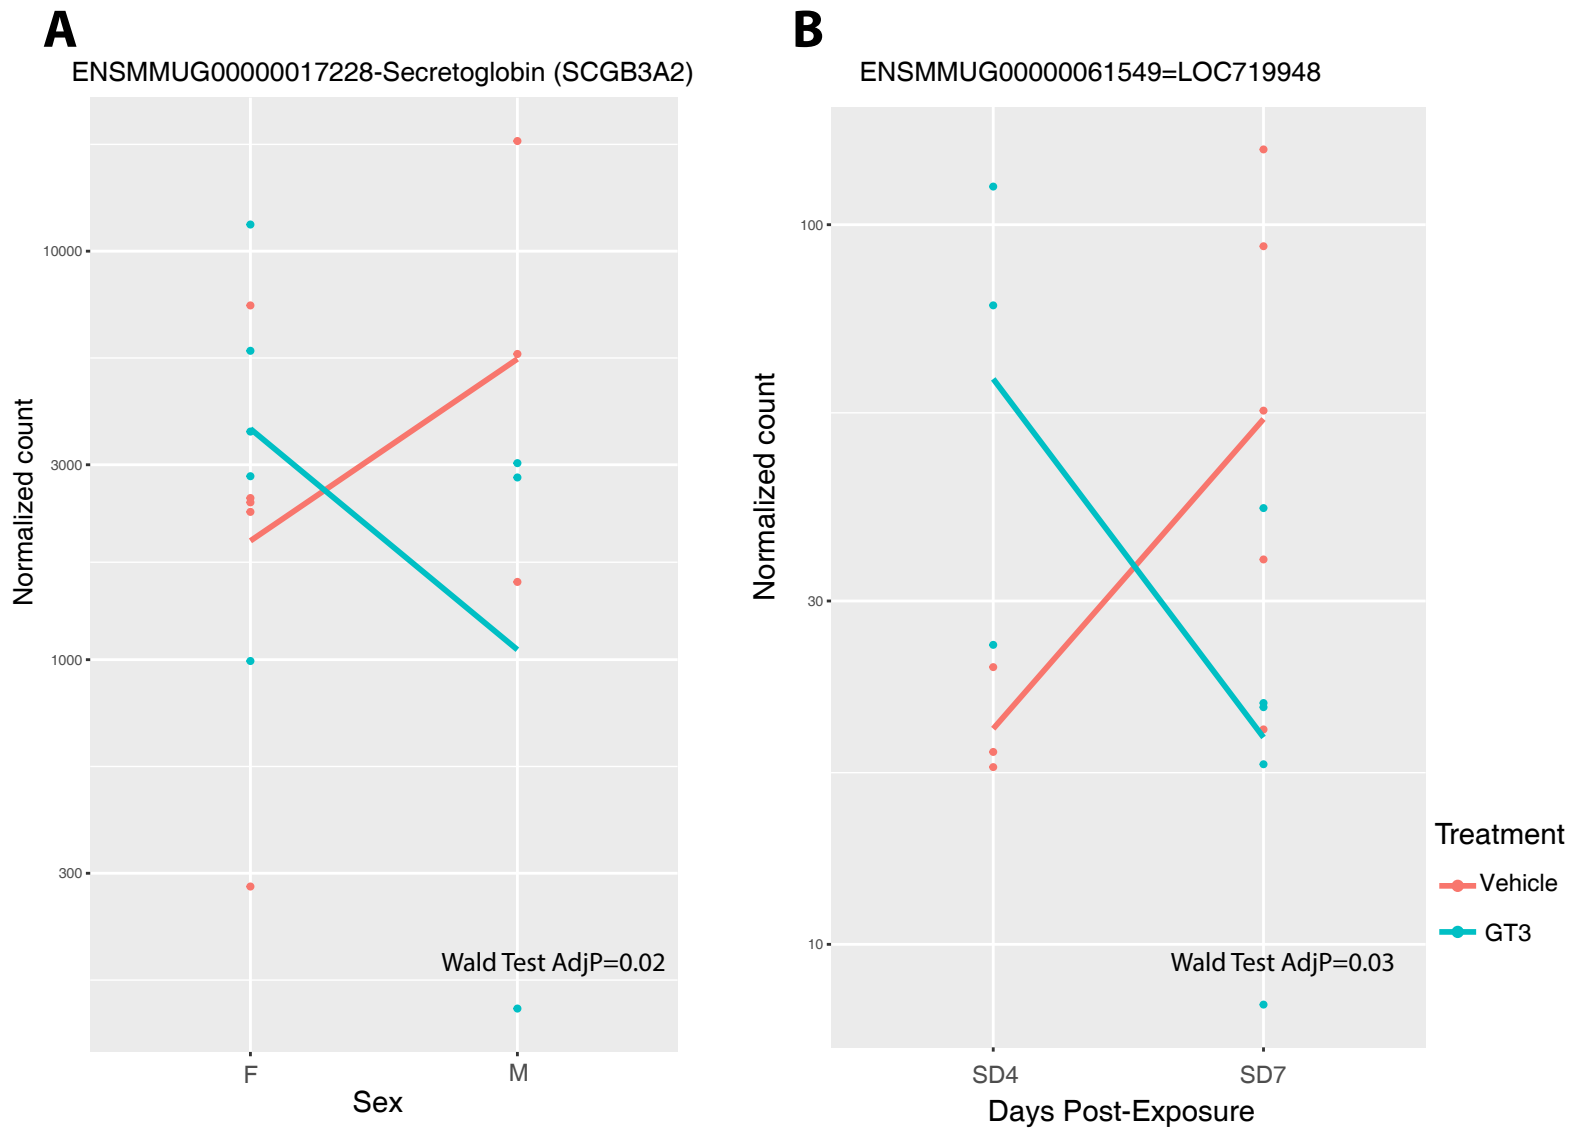

**Figure S5: A.** Secretoglobin was differentially expressed in male and female NHPs exposed to vehicle or GT3. In females, gene expression was higher after GT3 treatment, but in males, expression was higher in vehicle. X-axis represents male and female NHPs and Y-axis represents normalized gene counts. **B.** ENSMMUG00000061549 was differentially expressed in NHPs exposed to vehicle or GT3 at day 4 or day 7. At day 4, gene expression was higher after GT3 treatment, but at day 7, expression was higher in vehicle. X-axis represents male and female NHPs and Y-axis represents normalized gene counts.



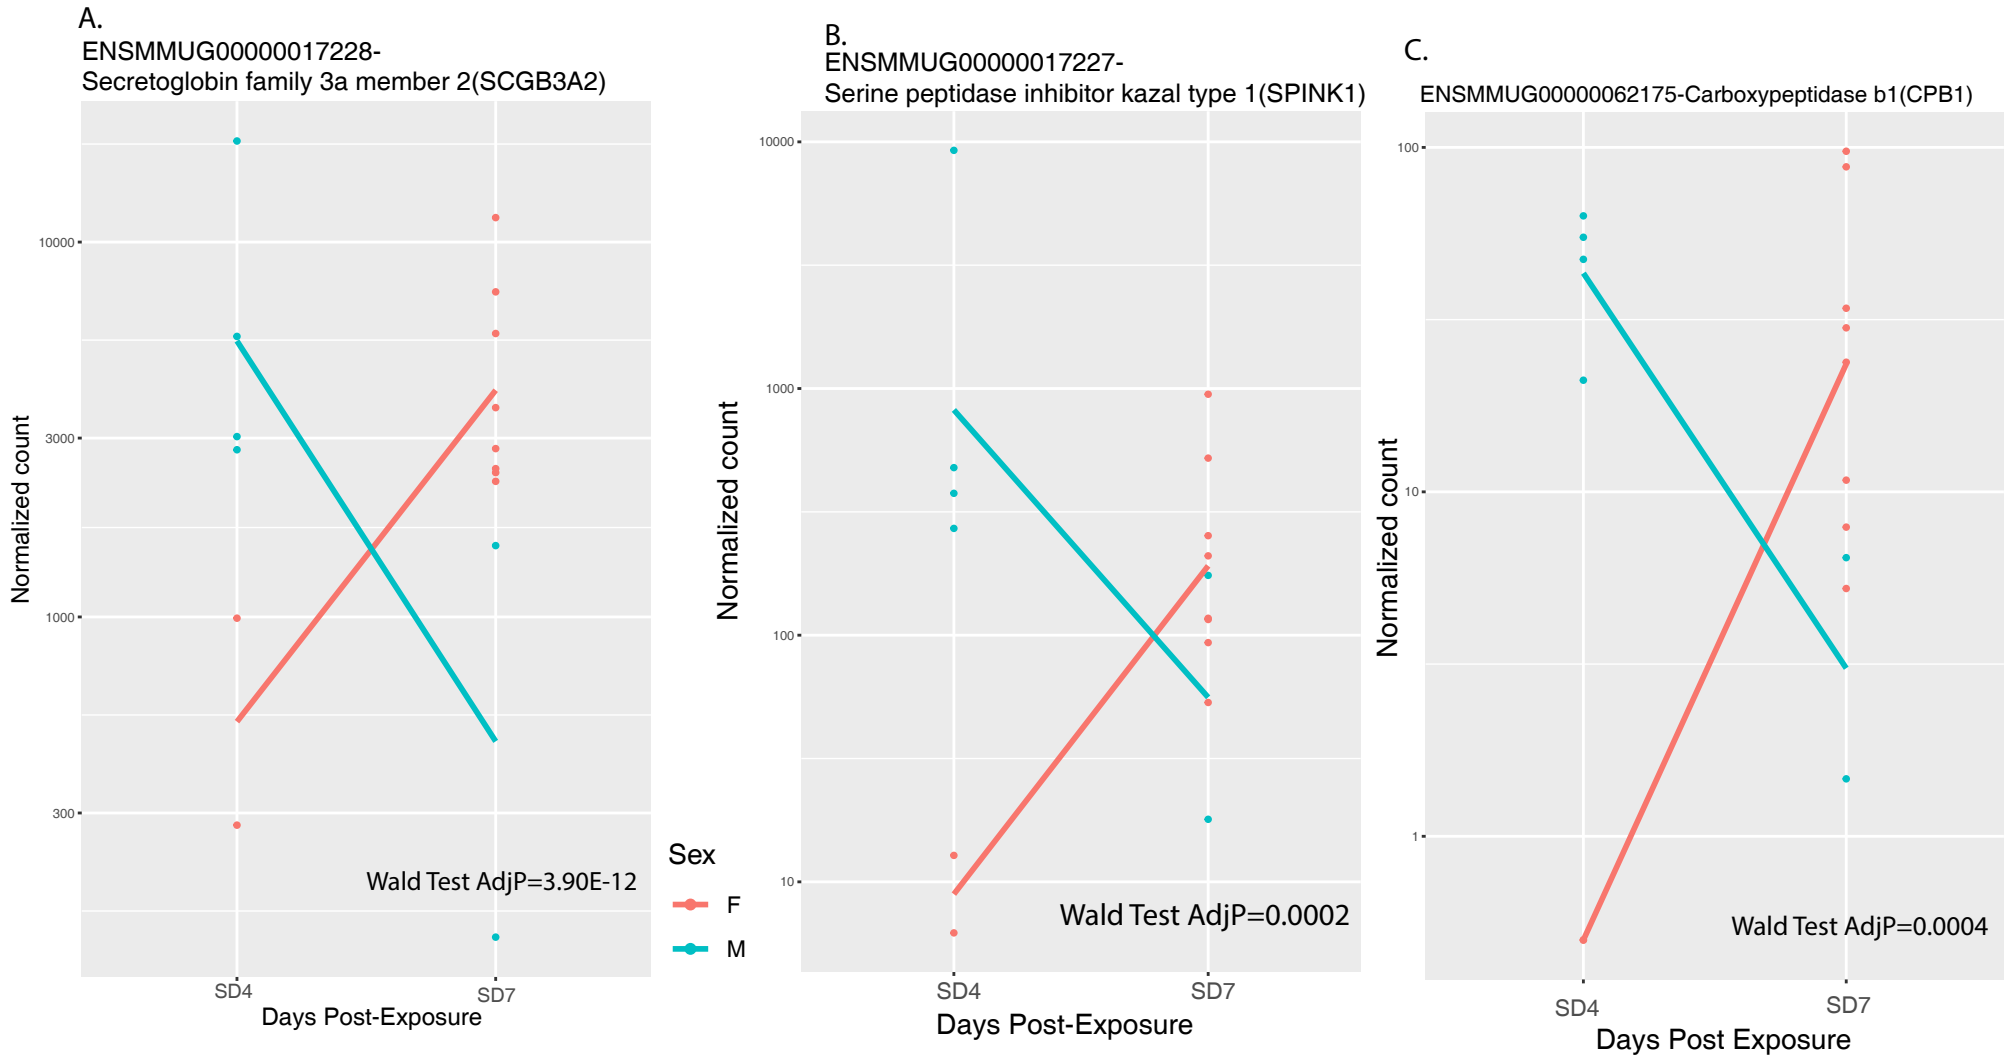

**Figure S6:** Secretoglobin, SPINK1, and CPB1 was differentially expressed in male and female GT3 treated NHPs at day 4 and day 7. At day 4, gene expression was higher in males after GT3 treatment, but at day 7, expression was higher in vehicle. X-axis represents days post-irradiation and Y-axis represents normalized gene counts.

ENSMMUG00000016939-Oxysterol binding protein like 3-OSBPL3

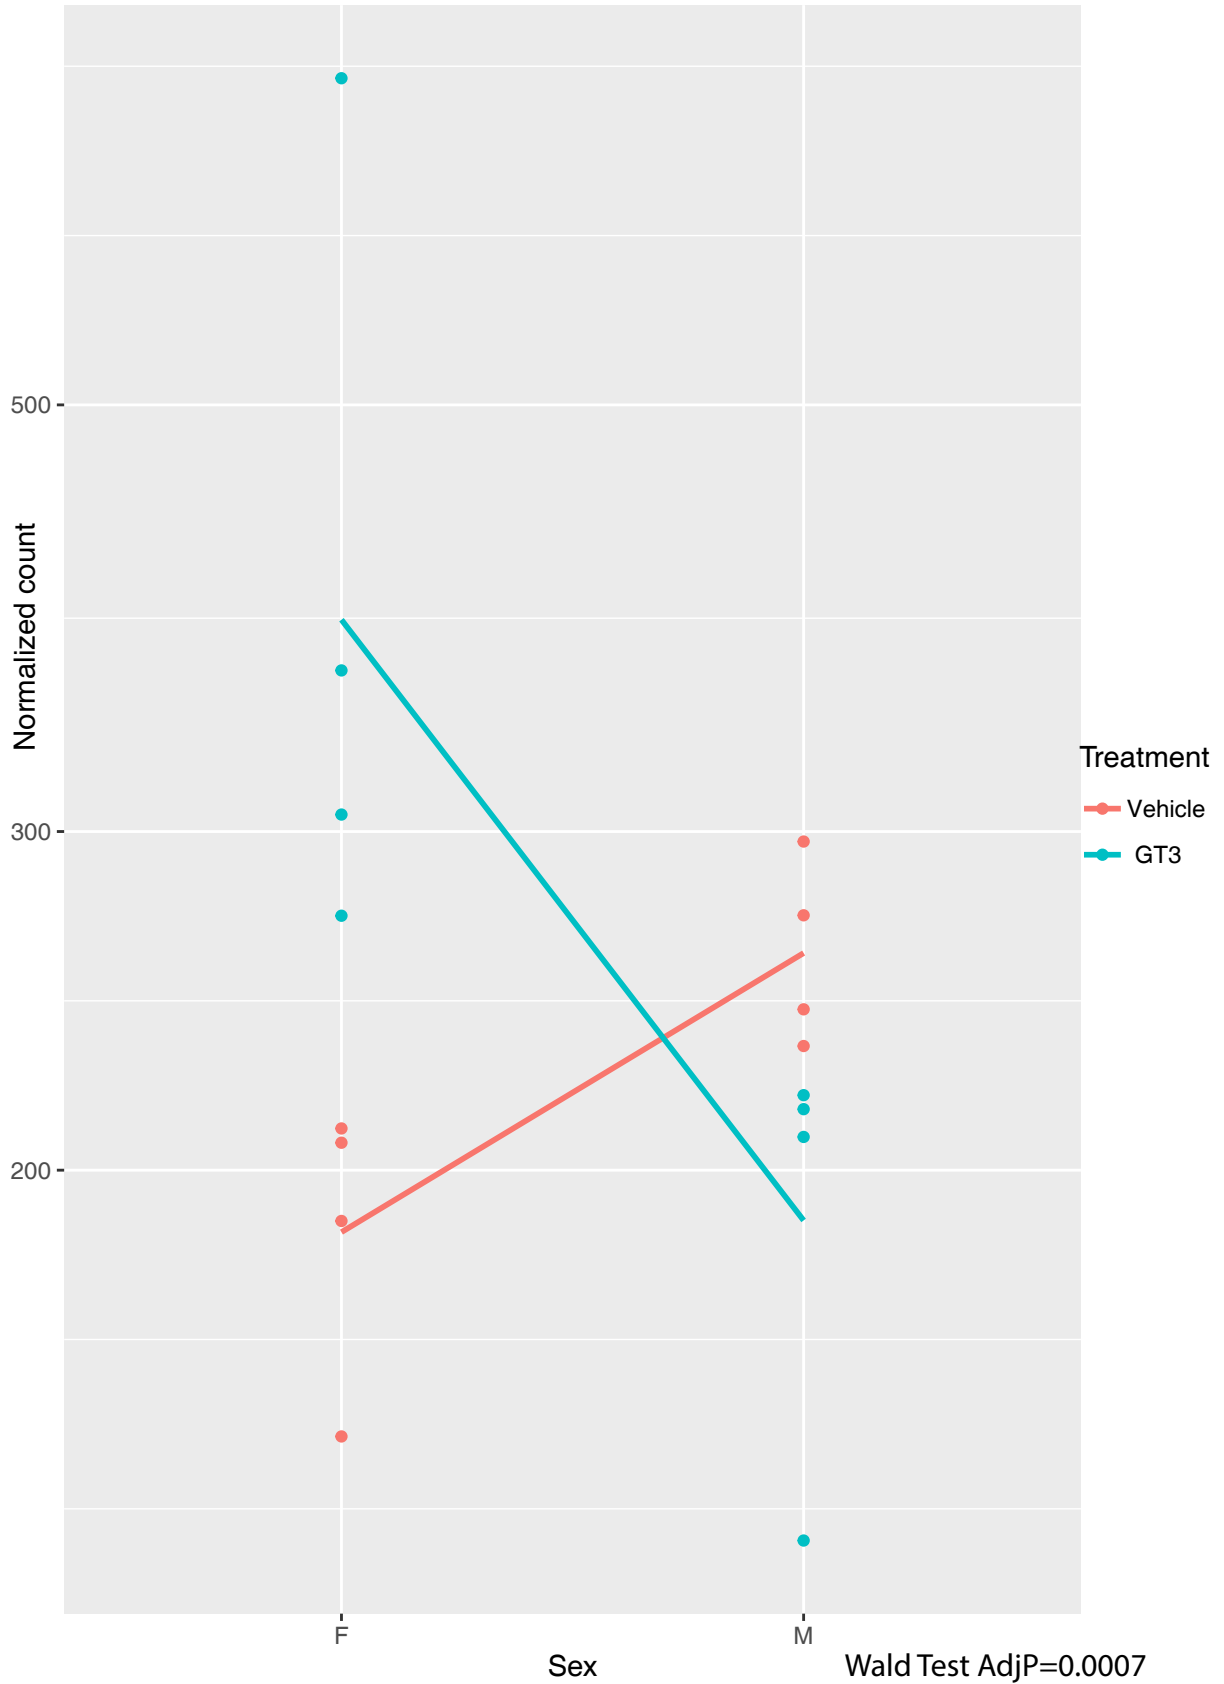

**Figure S7:** OSBPL3 gene expression was higher in females after GT3 treatment, whereas this gene had higher expression in vehicle treated males. X-axis represents the two sexes and Y-axis represents normalized gene counts.

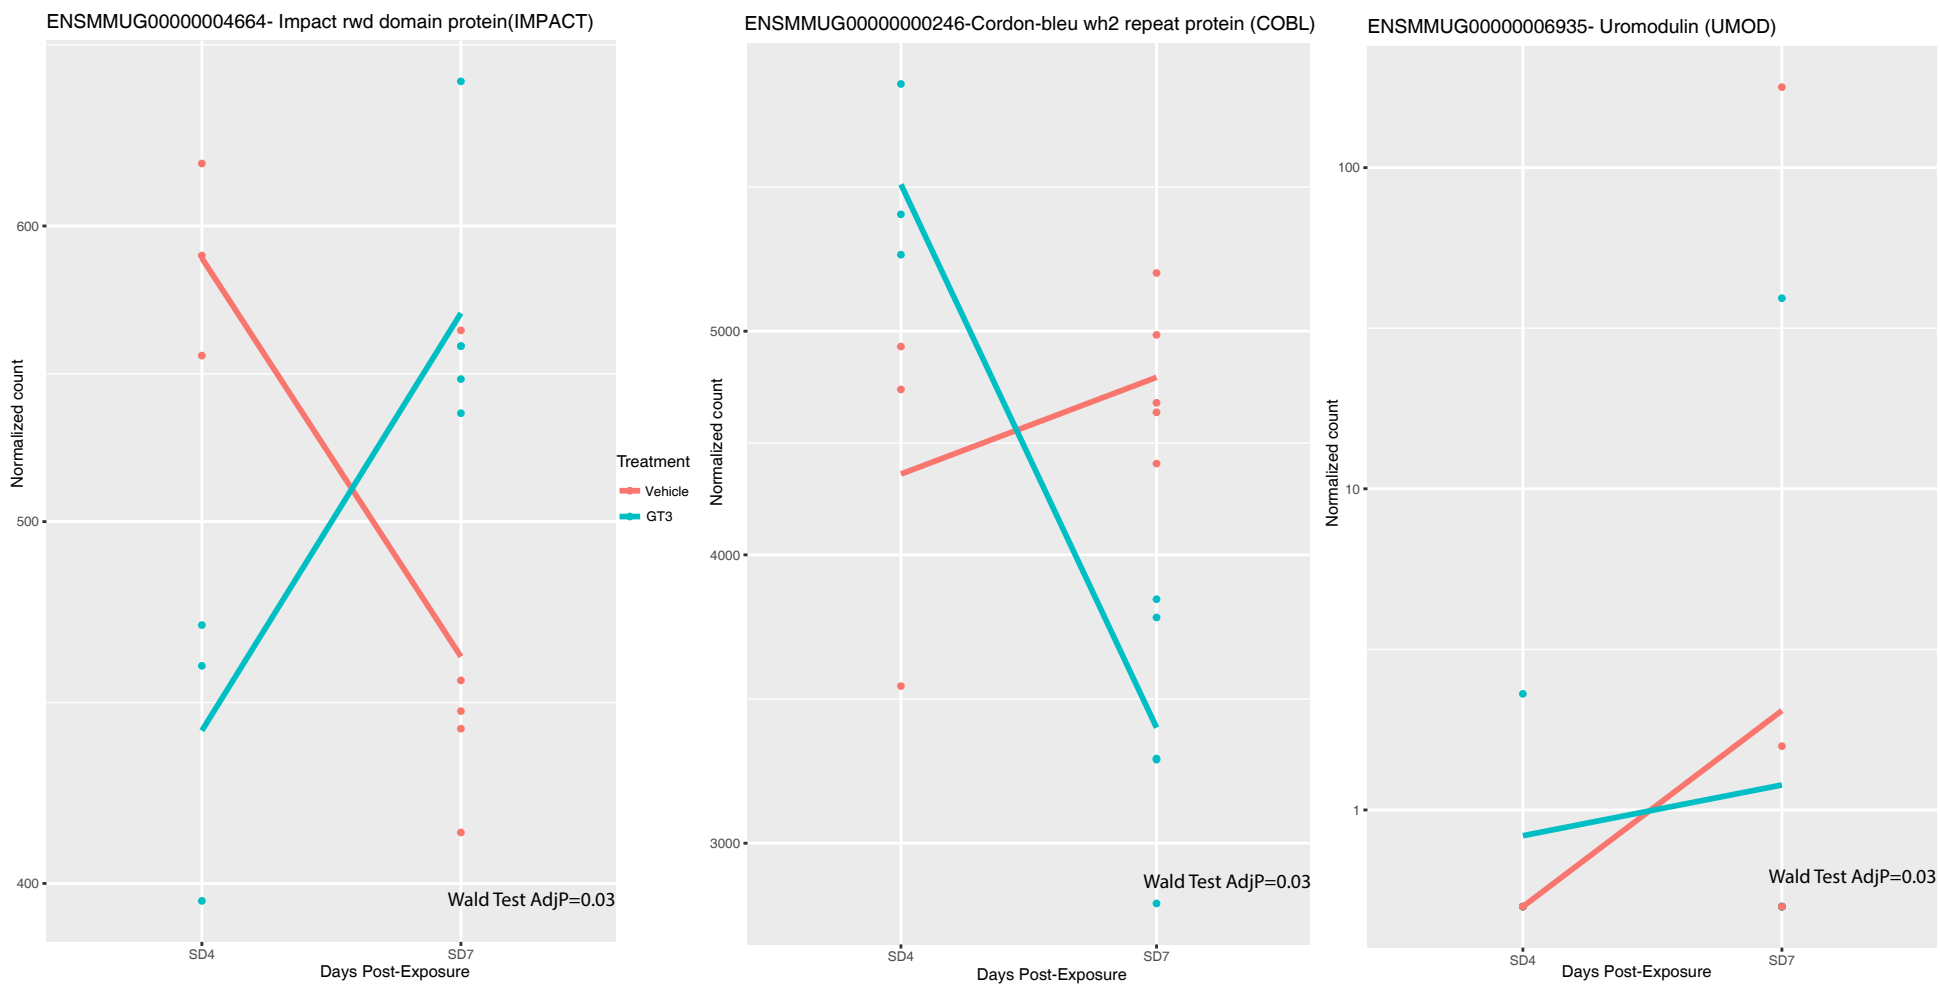

**Figure S8:** Gene expression differences across day 4 and day 7 of vehicle treated and GT3 NHPs. X-axis represents days post-irradiation and Y-axis represents normalized gene counts.

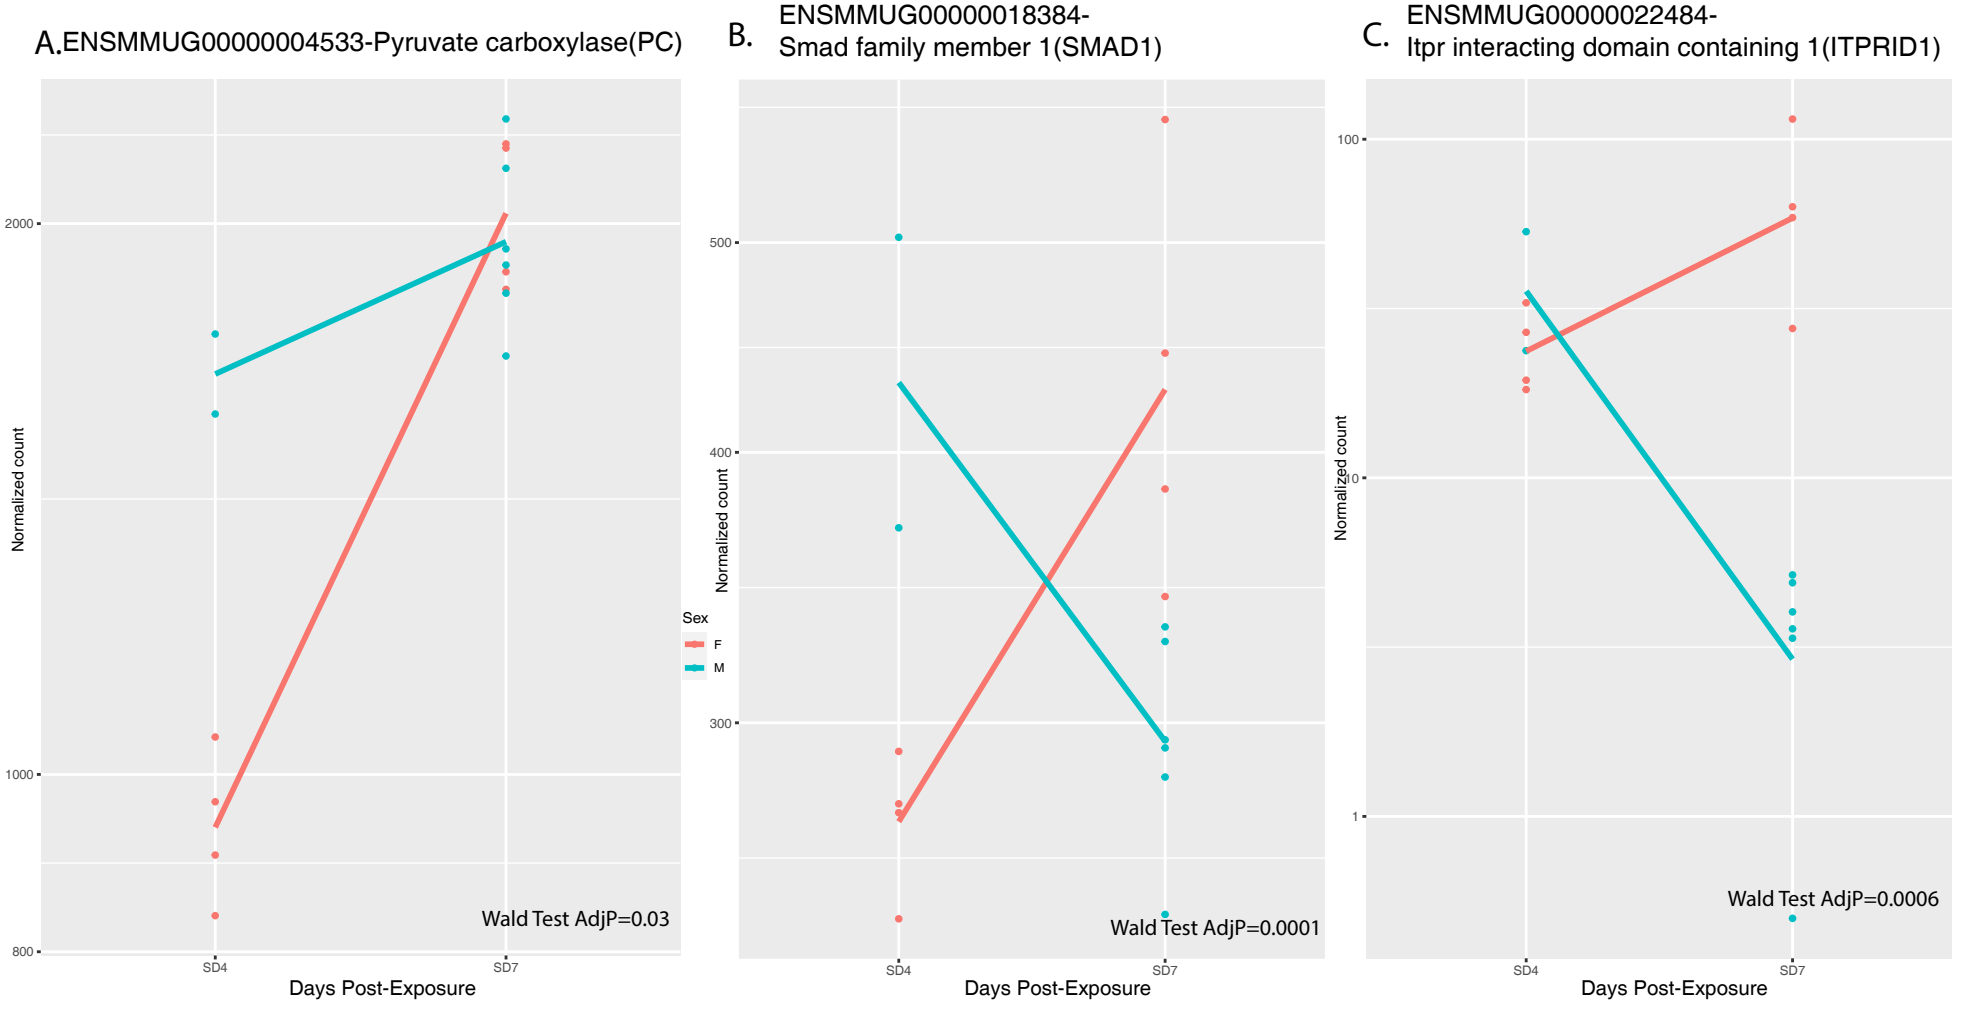

**Figure S9:** Gene expression differences in male and female NHPs pretreated with GT3 and irradiated. X-axis represents days post-irradiation and Y-axis represents normalized gene counts.

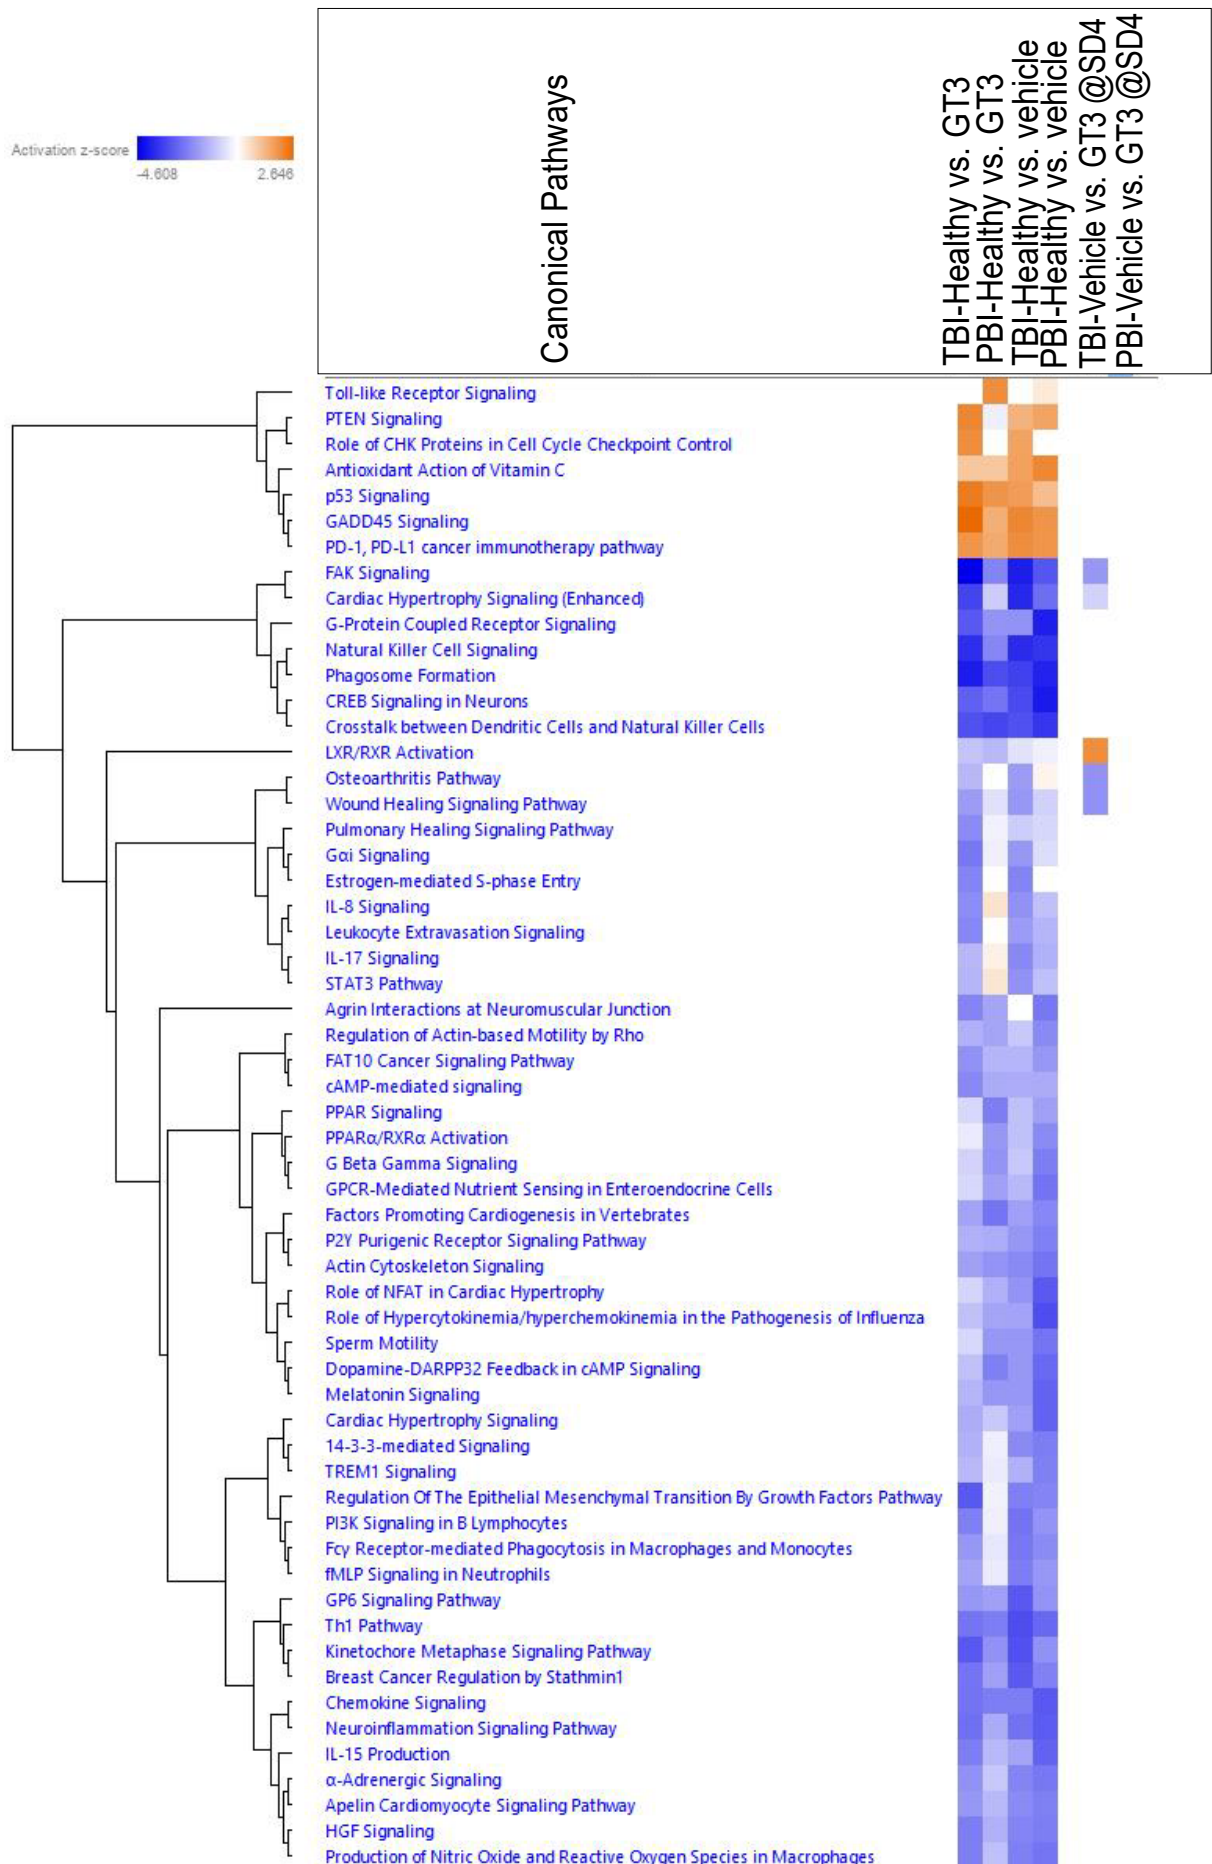

**Figure S10:** IPA comparison analysis across all comparisons. This analysis predicted pathways differentially regulated across different comparisons. Differentially activated pathways is represented in orange and repressed in blue. Hierarchical clustering was applied to both pathways.
